# Supplementary material
Source: PubMed Central journal article supplement (PMC9347300)
Supplement: Supp_FigS1.pdf [file Supp_FigS1.pdf]

### 3 Supplementary Figures

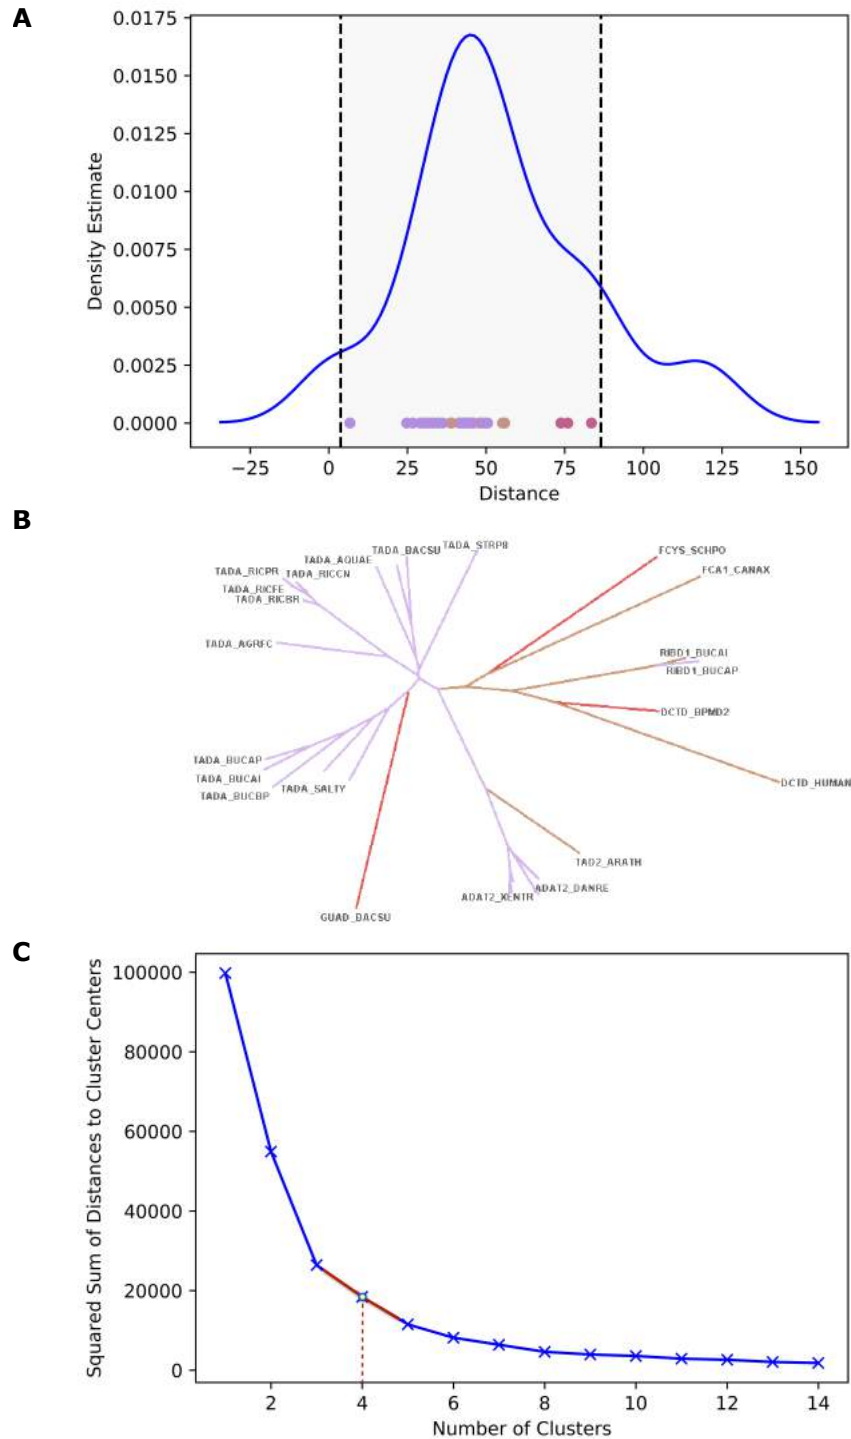

Figure S1: (A) Kernel density estimate (KDE) showing the distance of sequences from *E. coli* wtTadA from the first 2 principal components. (B) Phylogenetic analysis of the alignment for *E. coli* wtTadA. (C) Elbow plot to determine the optimal number of clusters to be used in k-means clustering.
