# Supplementary material
Source: PubMed Central journal article supplement (PMC9347300)
Supplement: Supp_FigS3-S4.pdf [file Supp_FigS3-S4.pdf]

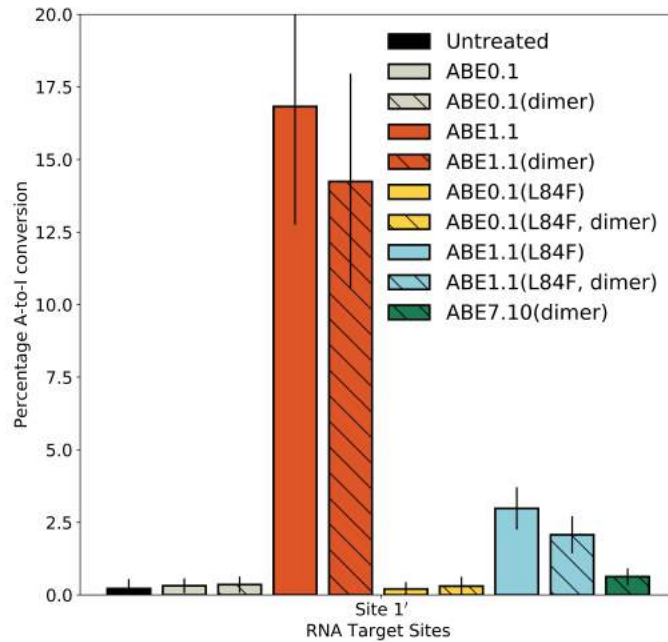

Figure S3: A-to-I base editing efficiencies in HEK293T cells by various ABE mutants at alternative RNA off-target site 1'. Values and error bars reflect the mean and SD of four independent biological replicates performed on different days.

#### Experimentally tested sites:

RNA site 1 (DNAJB1) (chr: 14518195)

GCGCTACCACCCGACAAGAACAAGGAGCCCGGCCGAGGAGAAGTTCAAGGAGATCGCTGAGGCC**TACG**ACGTGCTCAGCGACCCGC  
GCAAGCGGAGATCTTCGACCCTACGGGGAGGAAGGCCATAAGGGGAGTGGCCCCAGTGGCGGTAGCGGGTGGTGCCAATGGTACC  
TCTTCAGCTACACATTCCATGGAGACCCTCATGCCATG

RNA site 2 (MTA2) (chr: 62594034)

TCTGGCTTCAGGGATTTCGTTCAAGCTCACAGCCAGCAGCCAAGCGTCAGAAACTAAACCCAGCTGATGCCCCAATCCTGTGGTGTGTTG  
TGGCCACAAAGGATACCAGGGCC**TACG**GAAGGCTCTGACCCATCTGGAATGCGGCGAGCTGCTCGCCGACCCAACCTGCCCCGAAG  
GTGAAGCCAACGCTGATTGCAGTGGGCCCCCTGTCCCTCTACCTGCACCCCTCACATC

RNA site 3 (PTBP2) (chr: 96813053)

AGATTTTGGTAATTCCCATTGCATCGTTTTAAGAAACCTGGATCCAAAAATTTTCAAACATTTTTCTCCTTCTGCCACCCTTCACC  
TATCTAATATCCCTCCATCAGTAGCAGAAGAGGAT**TACG**AACACTGTTCGCTAACACTGGGGCACTGTGAAAGCATTTAAGTTTTTT  
CAAAGAGATCACAAAATGGCTCTTCTTCAGATGGCAACAGTGAAGAAGCTATTCAGG

RNA site 4 (SAP30BP) (chr: 75703316)

CAGAACCCCTGGCAGATGTTCAAATCACTTGCAAGACAAGATCCAGAAGCTTTATGAACGAAAGATAAAGGAGGGAATGGATATGAAC  
TACATTATCCAAAGGAAGAAAGAATTTTCGGAACCCTAGCAT**TACG**AGAAGCTGATCCAGTTCTGTGCCATTGACGAGCTTGGCACCAA  
CTACCCAAAGGATATGTTTGATCCCCATGGCTGGTCTGAGGACTCCTACT

RNA site 5 (LCMT1) (chr: 25164711)

ATTGCCAACACTCCTGATAGCTGAATGTGTGCTGGTTTACATGACTCCAGAGCAGTCCGCAAACCTCCTGAAGTGGGCAGCCAACAGTT  
TTGAGAGGCCATGTTCAATAA**TACG**AACAGGTGAACATGGGTGATCGGTTTGGGCAGATCATGATTGAAAACCTGCGGAGACGCCAG

---

TGTGACCTGGCGGGAGTGGAGACCTGCAAGTC

RNA site 6 (SCAP) (chr: 47420696)

CCATTGACATTCGCCGGATGGAGCTAGCAGACCTGAACAAGCGACTGCCCCCTGAGGCCTGCCTGCCCTCAGCCAAGCCAGTGGGACAG  
CCAACGCGCTACGAGCGGCAGCTGGCTGTGAGGCCGTCCACACCCACACCATCACGTTGCAGCCGTCTTCTTCCGAAACCTGCGGCT  
CCCCAAGAGGCTGCGTGTGTCTACTTC

**Sequence used in the simulations:**

UUGACUACGAUCAA

Figure S4: RNA sequences tested in the experimental analyses and simulation models. The amplicon sequences pertain to the cDNA used for sequencing analysis. Thus, every T should be considered a U in RNA. The consensus sequence for all sites tested is hence -UACG-, which is the same as the native RNA substrate sequence used in the simulation models.
