# Supplementary material
Source: PubMed Central journal article supplement (PMC9347300)
Supplement: Supp_FigS6.pdf [file Supp_FigS6.pdf]

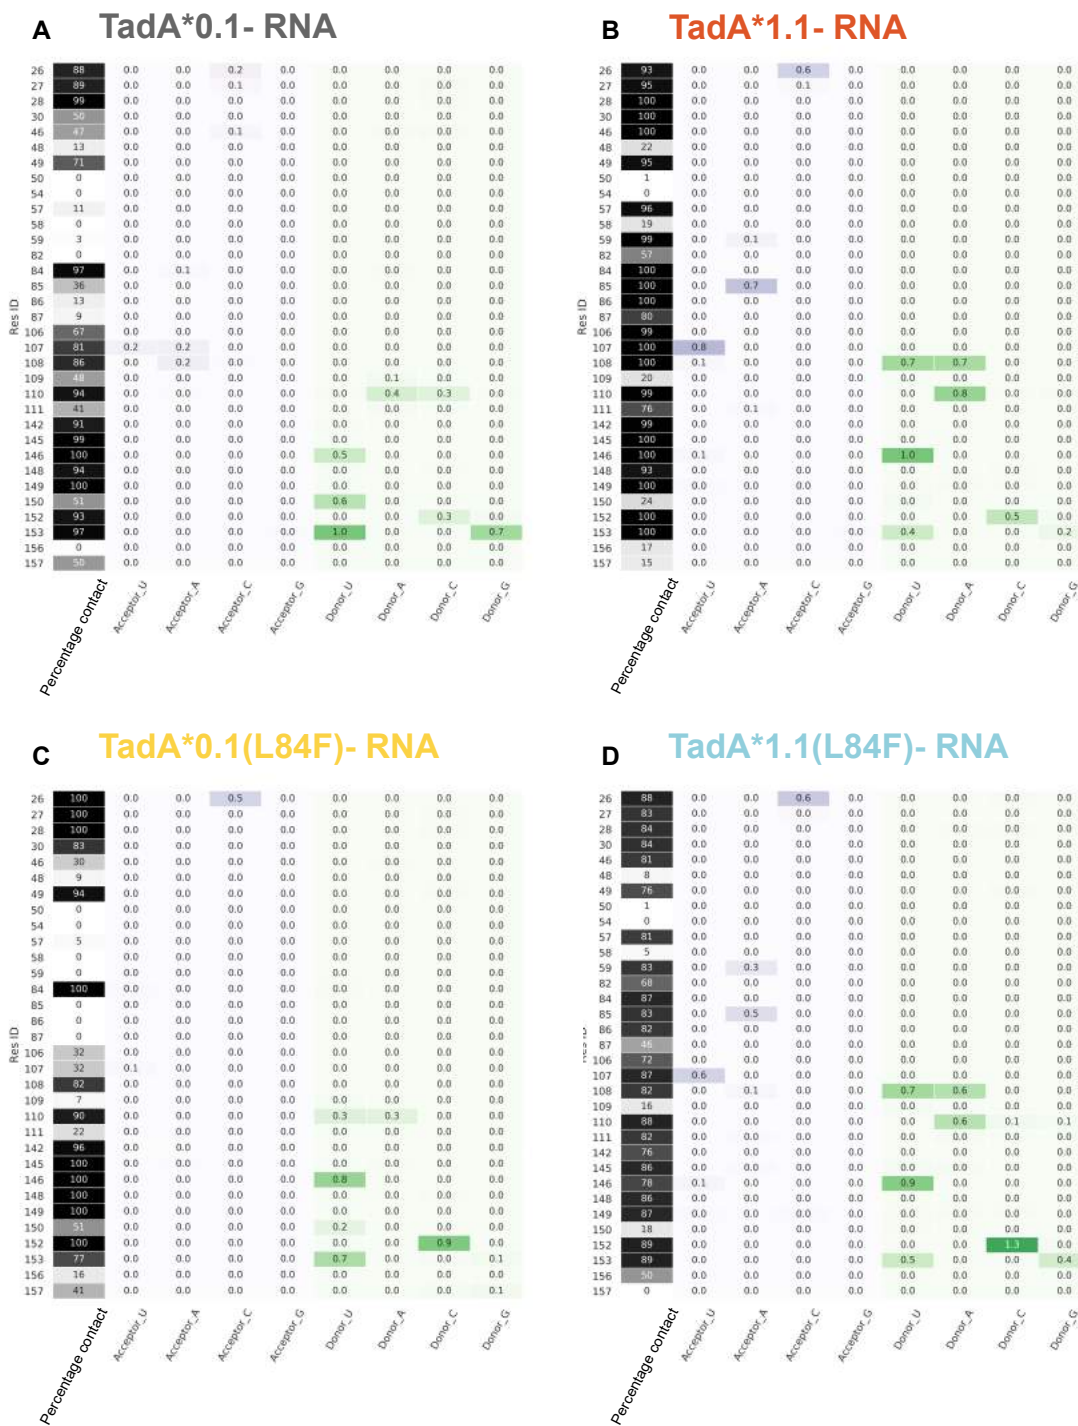

Figure S6: Percentage contact and the fractional H-bonding between the -UACG- consensus sequence nucleotides and the first interaction shell amino acids. For (A) TadA\*0.1, (B) TadA\*1.1, (C) TadA\*0.1(L84F) and (D) TadA\*1.1(L84F) in complex with RNA. The intensity of the colors in the columns signifies the magnitude of the percentage contact and the H-bonding strength.
