# Supplementary material
Source: PubMed Central journal article supplement (PMC9347300)
Supplement: Supp_FigS8.pdf [file Supp_FigS8.pdf]

Binding Energy of TadA\*0.1-RNA Complex Using Umbrella Sampling ( $k = 20 \text{ kcal/mol } \text{\AA}^2$ )

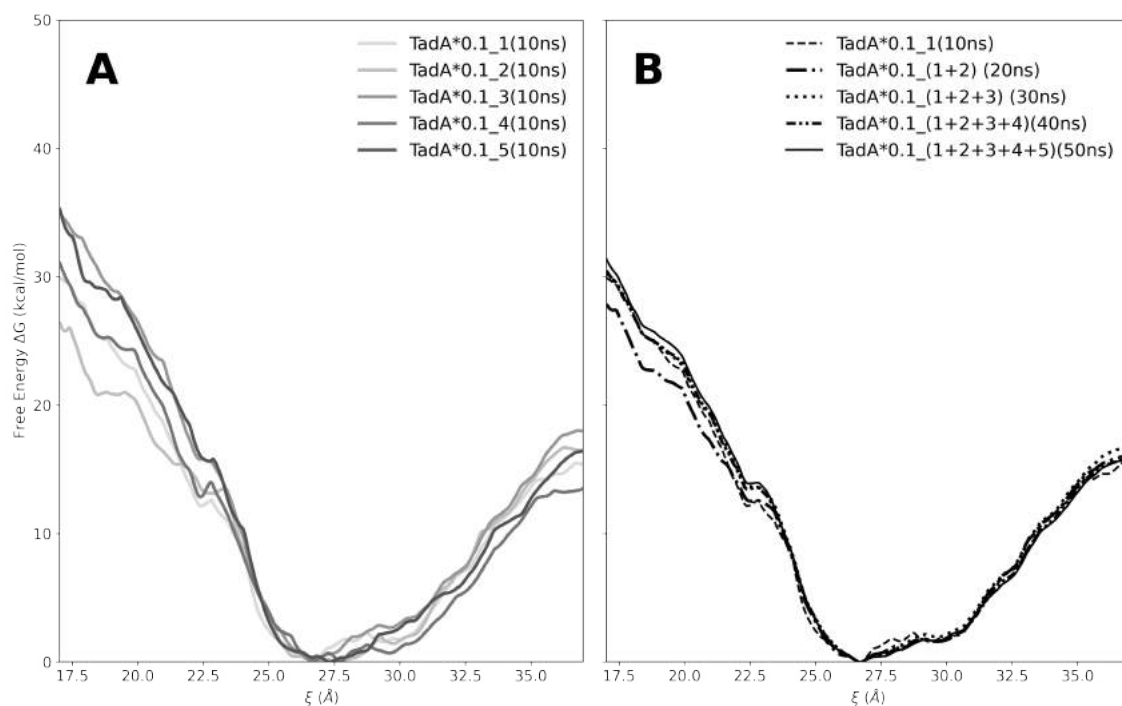

Figure S8: Analysis of the convergence for the local free energy changes in the TadA\*0.1-RNA complex. (A) Free energy curves for 5 independent, 10 ns long, umbrella sampling simulations. (B) The running average of the free energy curves as these simulations are progressively combined together, from 10ns (TadA\*0.1\_1) to 50ns (TadA\*0.1\_1\_2\_3\_4\_5). This analysis shows that average free energy is converged on the time scale of umbrella sampling simulations used in this study.
