# Supplementary material
Source: PubMed Central journal article supplement (PMC9347300)
Supplement: Supp_FigS9.pdf [file Supp_FigS9.pdf]

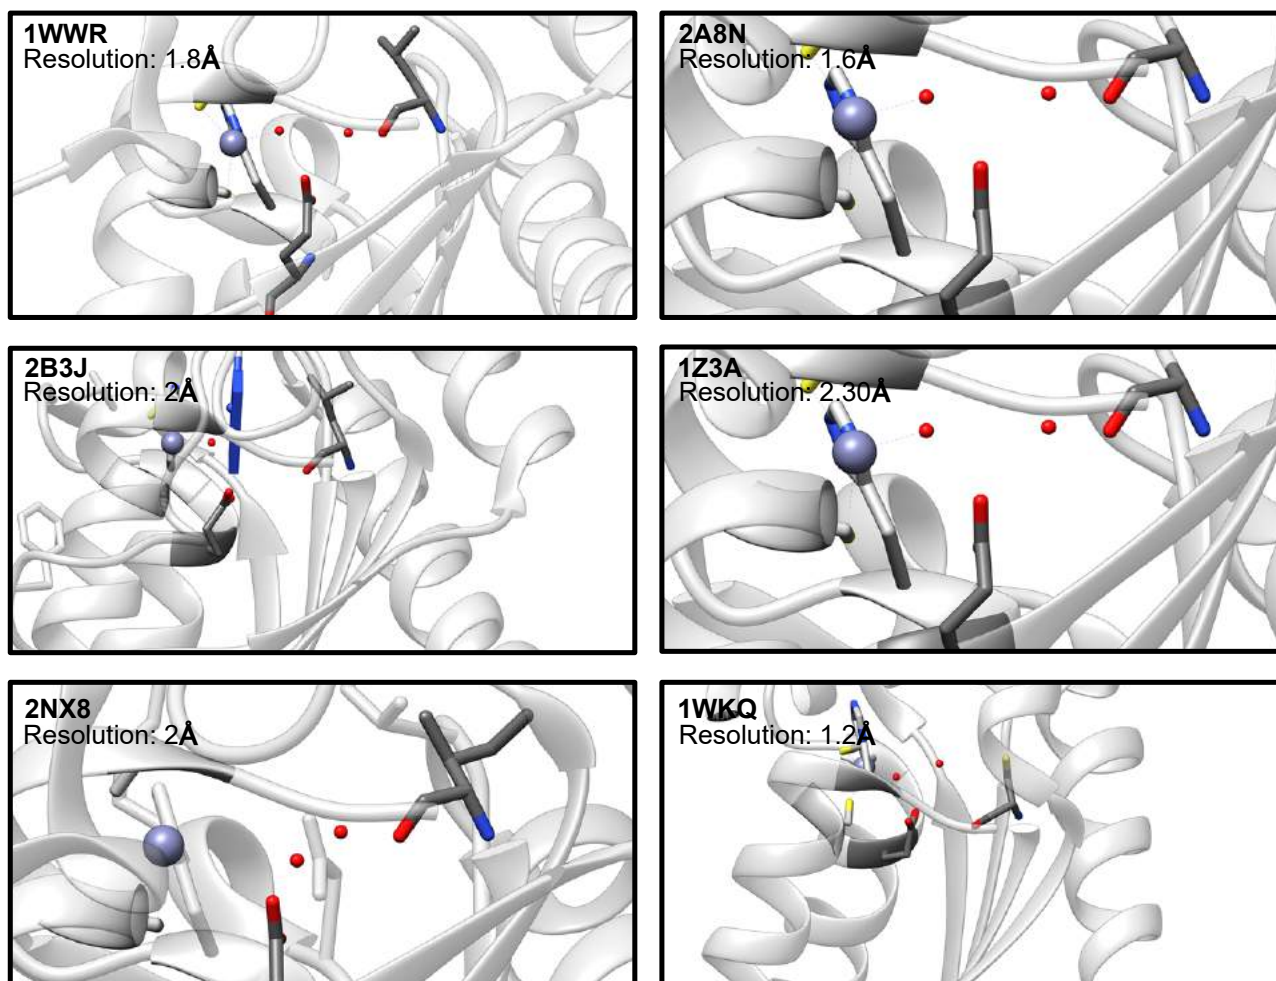

Figure S9: Crystal structures of *ecTadA* homolog highlighting the active site architecture and the relative position of the two critical waters, the activated water and the bridging water, hydrogen bonded to the same glutamate oxygen atom.
