# Supplementary material
Source: PubMed Central journal article supplement (PMC9347300)
Supplement: Supp_FigS10.pdf [file Supp_FigS10.pdf]

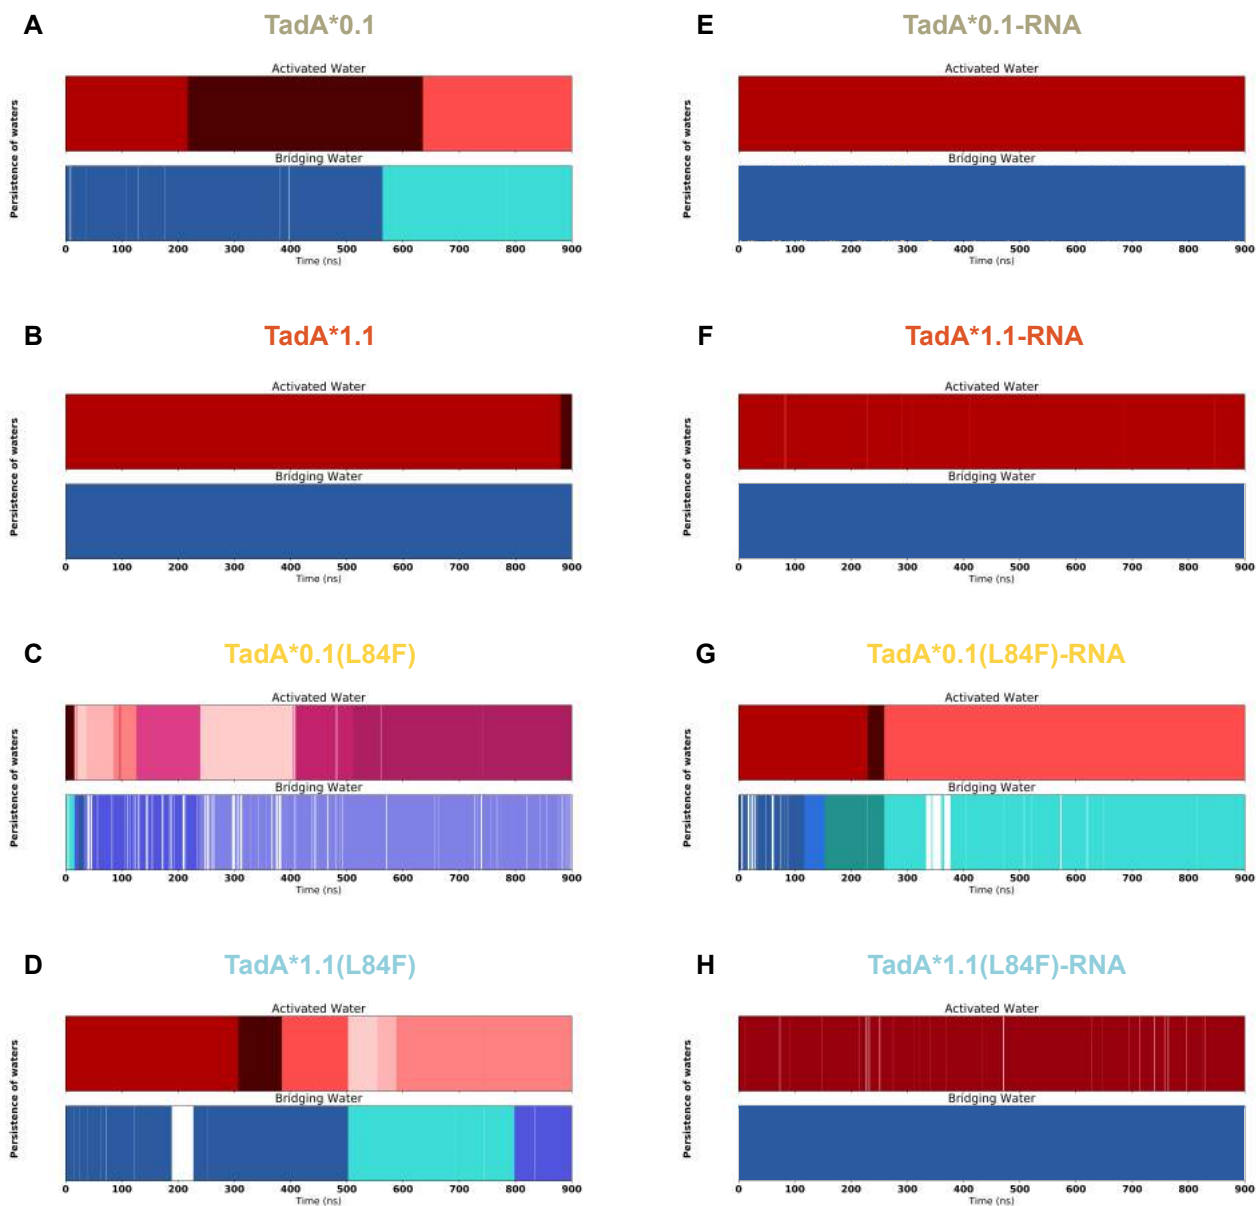

Figure S10: Persistence of the activated and bridging water at their respective positions calculated through the analysis of the unbiased MD trajectories of the apo-TadA\* models ((A) to (D)) and for TadA\*-RNA models ((E) to (G)). The different colors signify a unique water molecule that visited these critical water positions. Note that the data was obtained using a distance-based mask of 3.5 Å from the Zn<sup>+2</sup> ion, for activated water and from the peptide backbone of the 84 residue, for the bridging water.
