# Supplementary material
Source: PubMed Central journal article supplement (PMC9347300)
Supplement: Supp_FigS11.pdf [file Supp_FigS11.pdf]

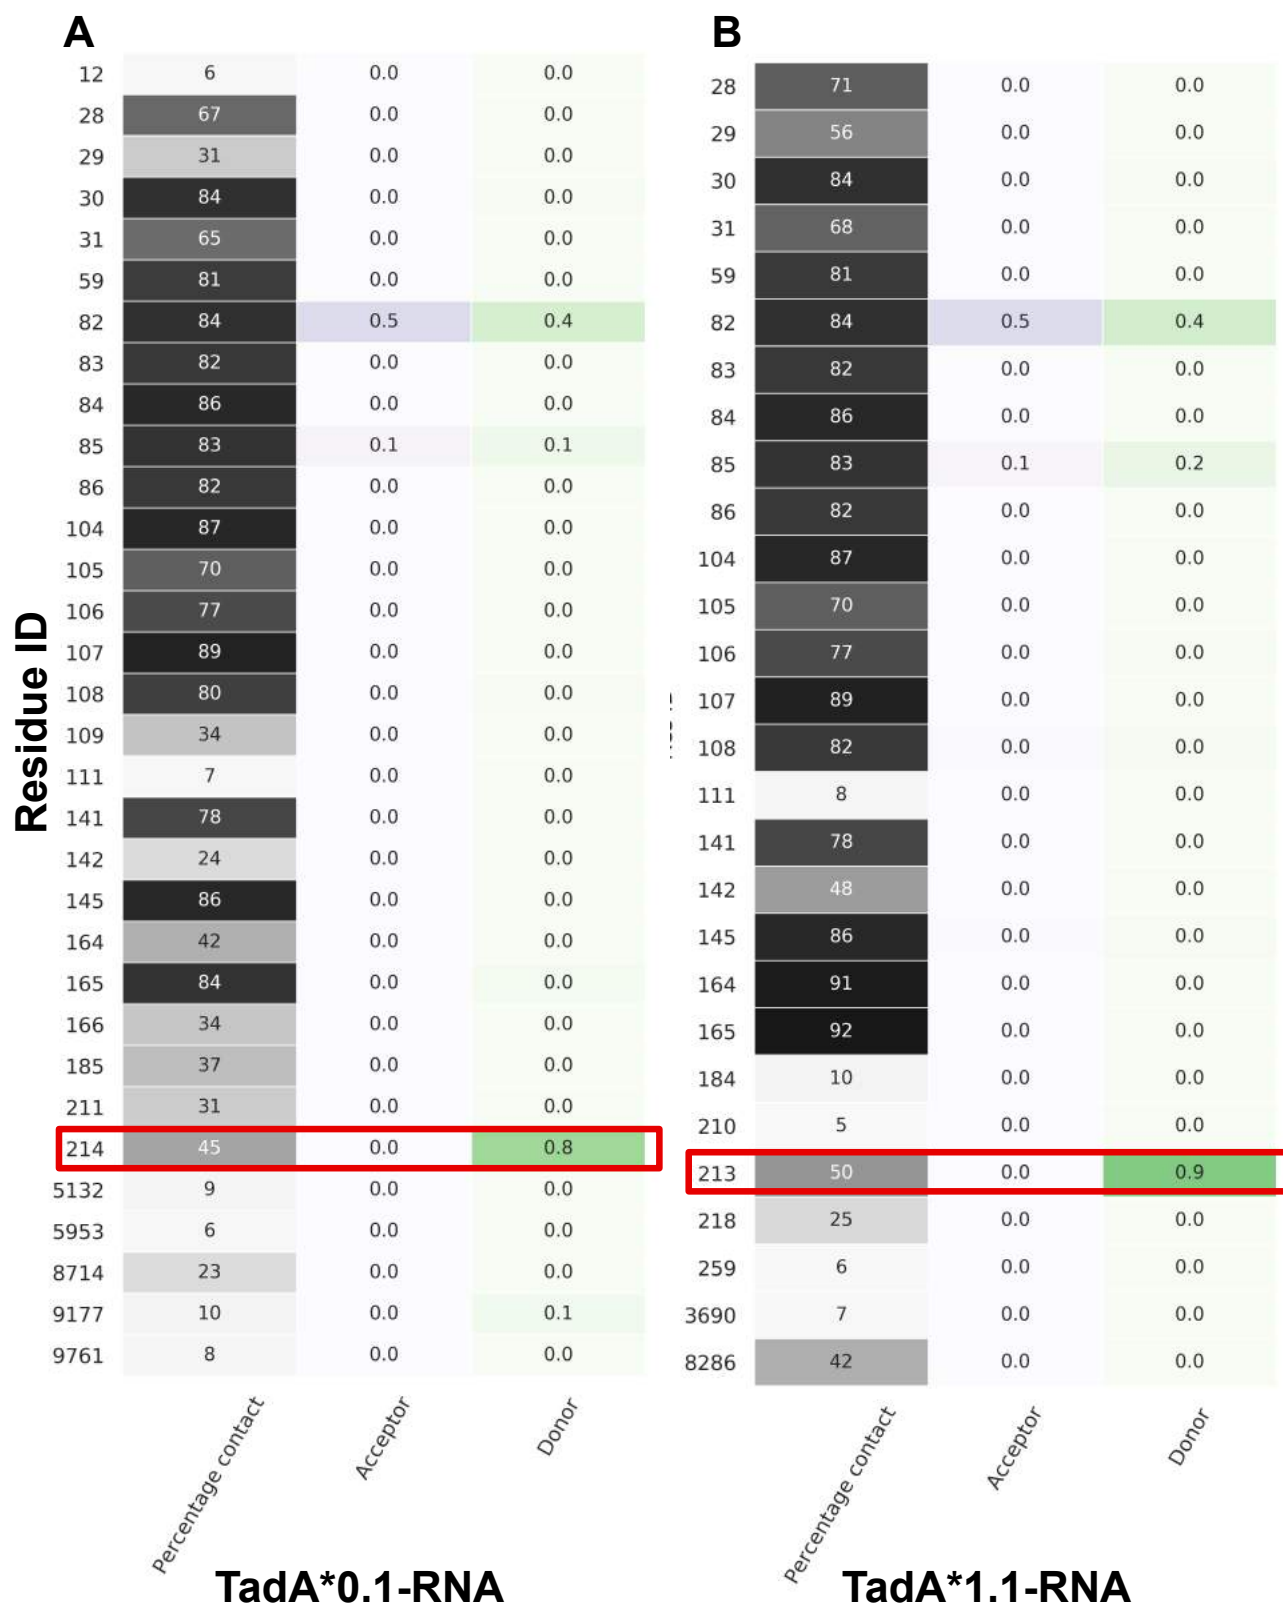

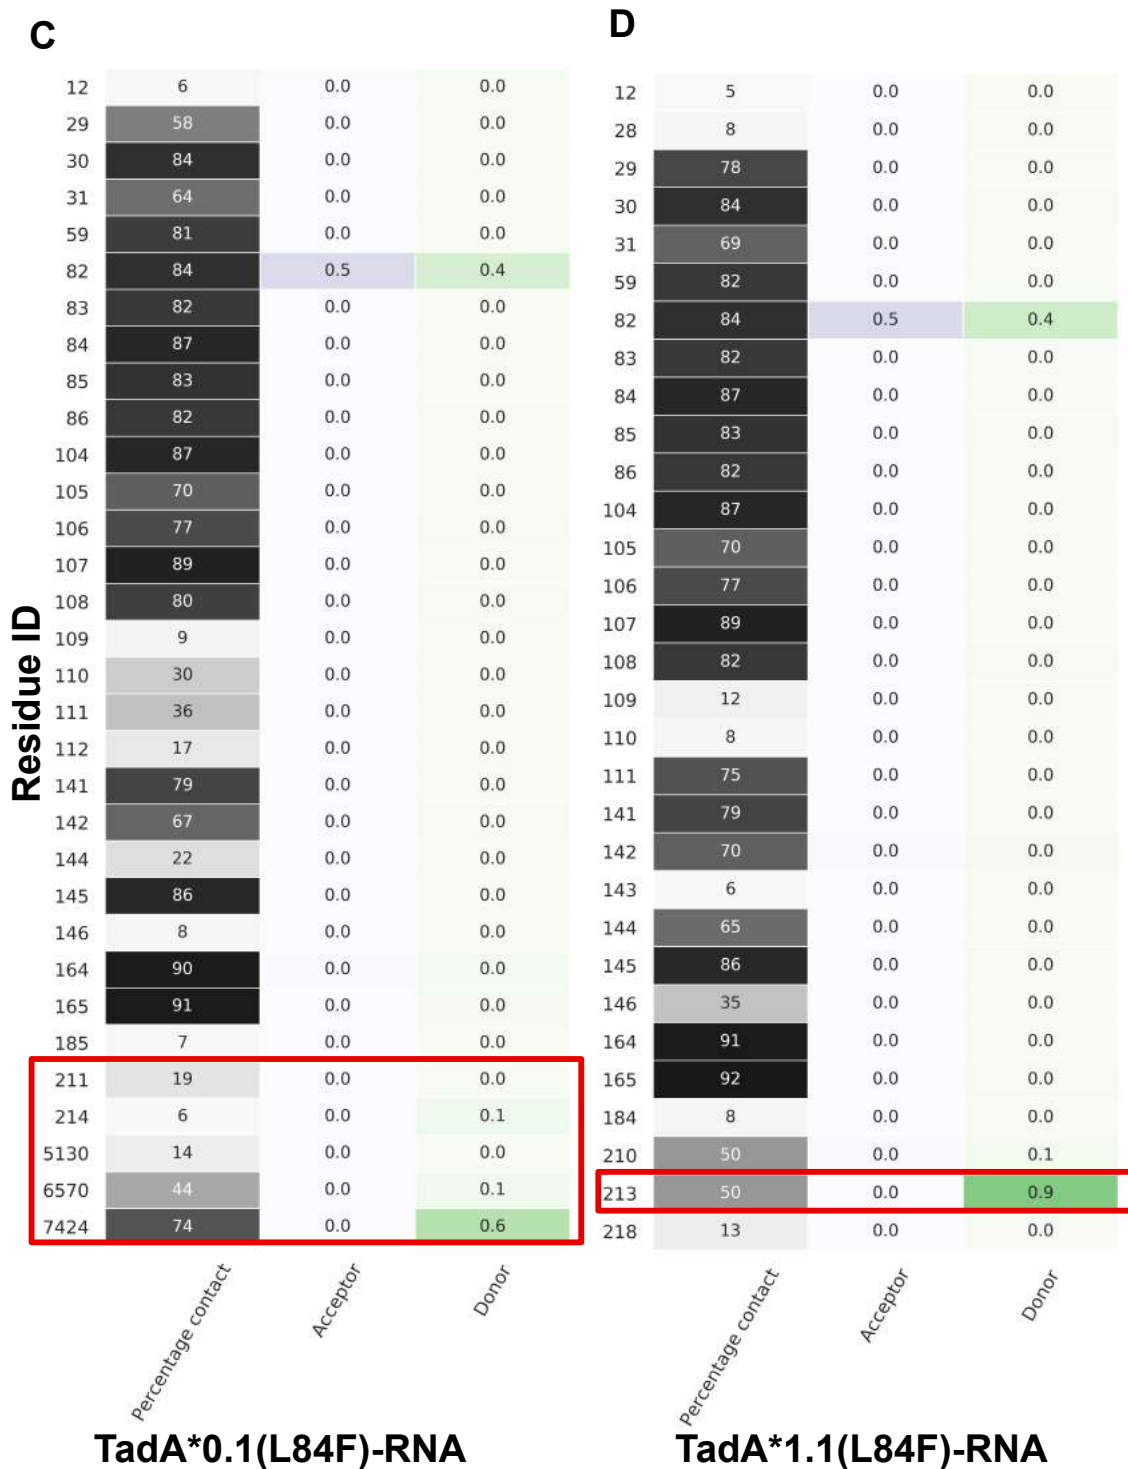

Figure S11: Percentage contact and the fractional H-bonding of the 84 residue. For (A) TadA\*0.1, (B) TadA\*1.1, (C) TadA\*0.1(L84F) and (D) TadA\*1.1(L84F) in complex with RNA. The intensity of the colors in the columns signifies the magnitude of the percentage contact and the H-bonding strength. The waters bridging (i.e. the bridging waters) the backbone of 84 residue and the Glu<sup>59</sup> residue are highlighted for each mutant.
