# Supplementary material
Source: PubMed Central journal article supplement (PMC9347300)
Supplement: Supp_FigS15.pdf [file Supp_FigS15.pdf]

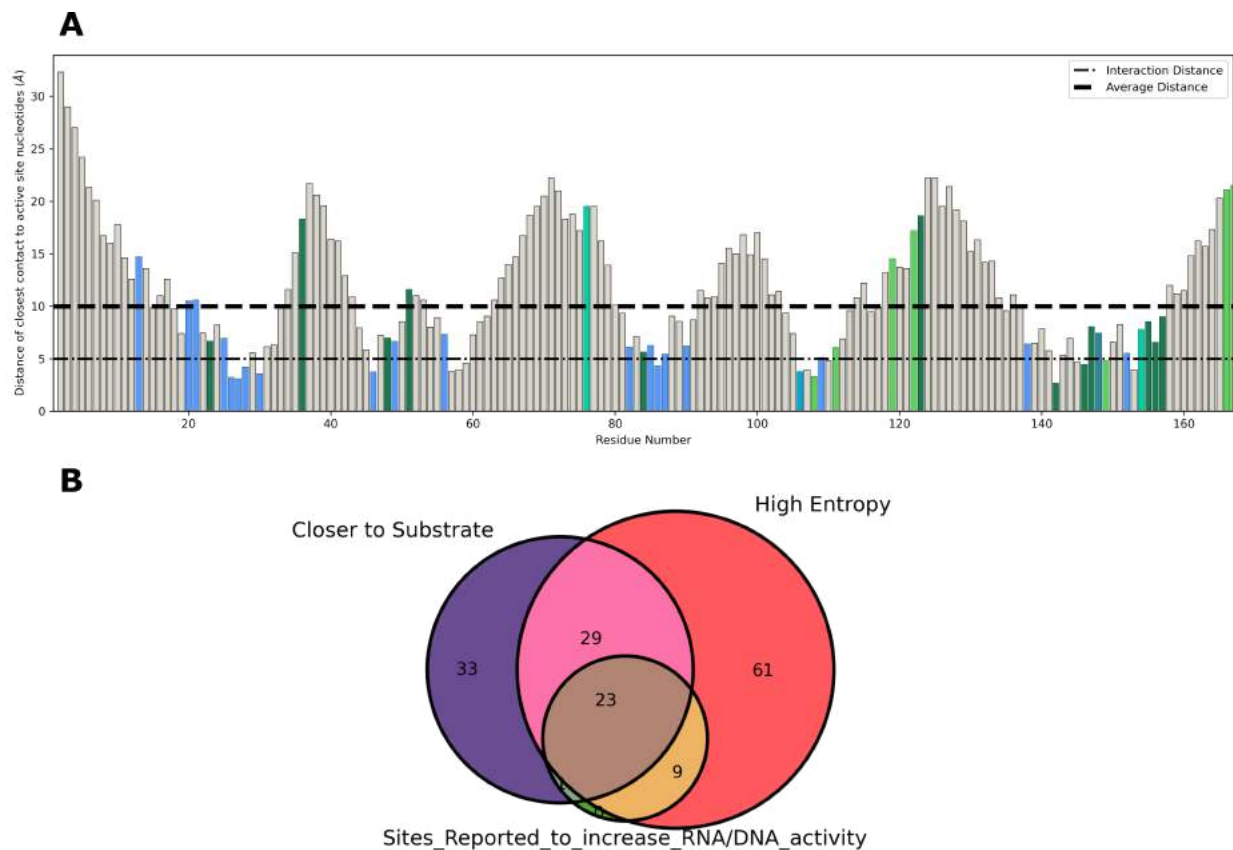

Figure S15: (A) Distance of closest contact between TadA\* residues ( $C\alpha$  atom) and the target RNA nucleotide, highlighting the various positions that have mutational data associated to them. 91% of all mutations occur at residues with contact distance less than the average contact distance ( $10 \text{ \AA}$ ) in TadA\*-RNA structure. Moreover, 36.9% of the mutations lie within interaction distance ( $5 \text{ \AA}$ ) of the nucleotide target. (B) Venn diagram depicting the intersections between the residues with high entropy, residues which have contact distance less than the protein average ( $10 \text{ \AA}$ ), and the residues which have been shown to increase editing efficiency of TadA\* upon mutagenesis.
