# Supplementary material
Source: PubMed Central journal article supplement (PMC9347300)
Supplement: Supp_FigS16.pdf [file Supp_FigS16.pdf]

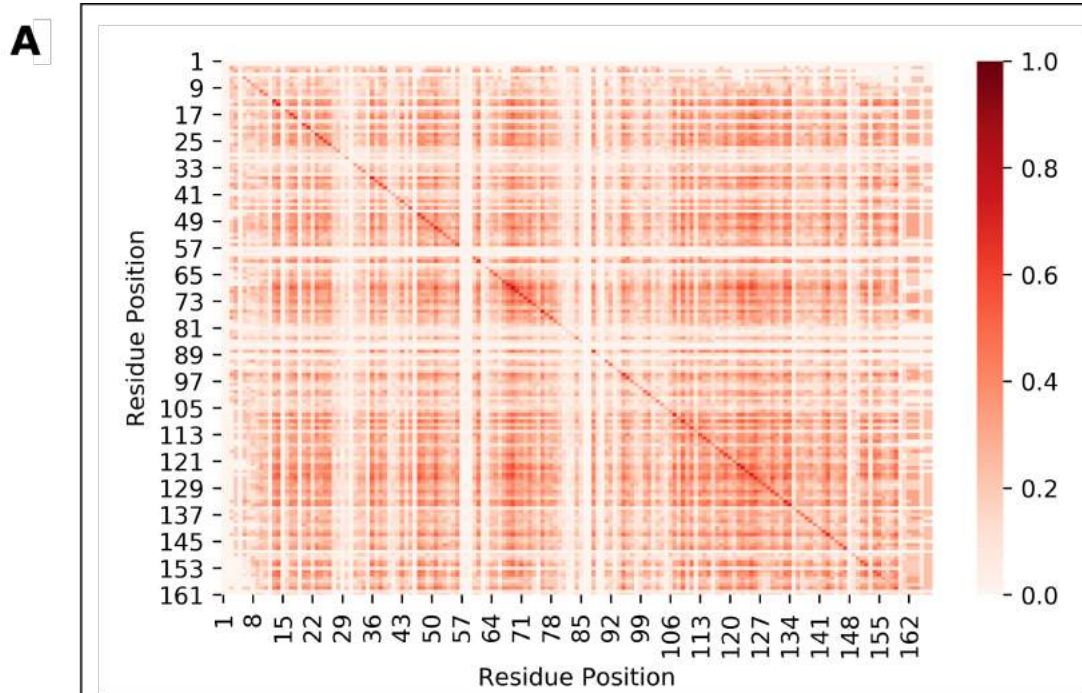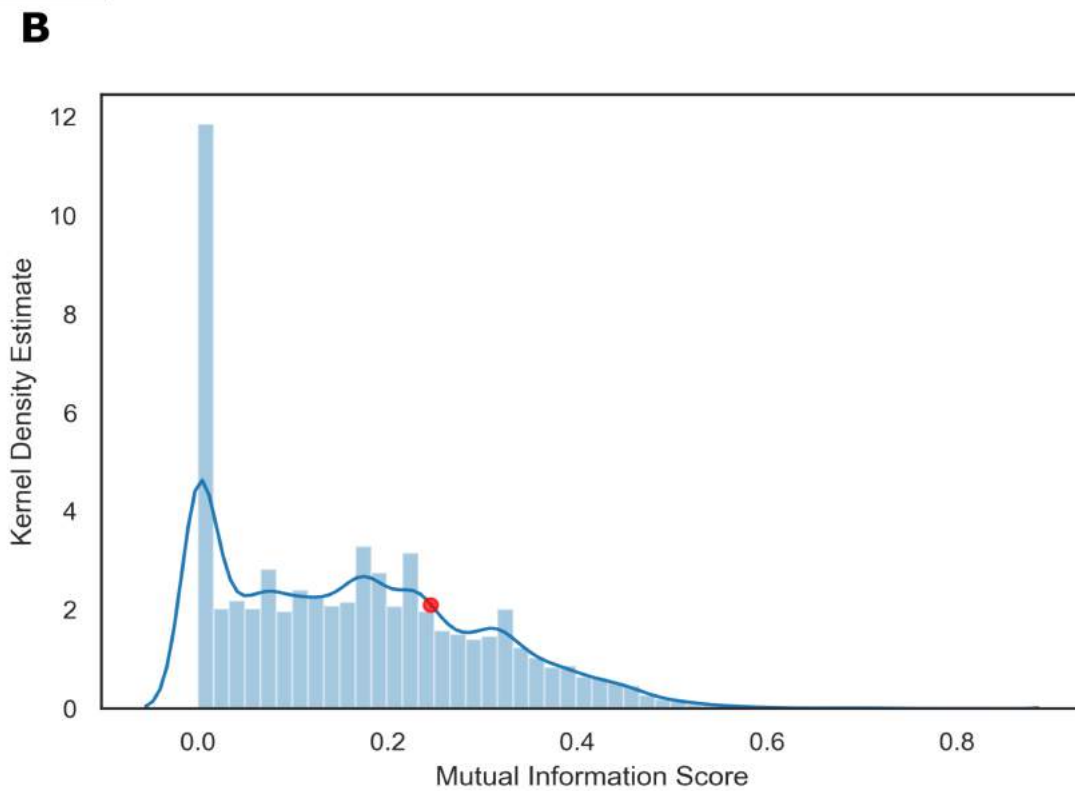

Figure S16: (A) Mutual information scores between pairs of residues for *E. coli* wtTadA. (B) Histogram showing the distribution of these mutual information scores. The value of the mutual information between residue 84 and 108 is indicated in red.
