# Supplementary material
Source: PubMed Central journal article supplement (PMC9347300)
Supplement: Supp_TableS1-S2.pdf [file Supp_TableS1-S2.pdf]

## 4 Supplementary Tables

Table S1: RNA sequences:

| RNA Site      | Gene name | Amplicon                                                                                                                                                                                                                                                 |
|---------------|-----------|----------------------------------------------------------------------------------------------------------------------------------------------------------------------------------------------------------------------------------------------------------|
| 1             | DNAJB1    | GCGCTACCACCCGGACAAGAACAAGGAGCCCGGCGCCGAGGAGAAGTTCAAGGAGATCGC<br>TGAGGCCTACGACGTGCTCAGCGACCCGCGCAAGCGCGAGATCTTCGACCGCTACGGGGA<br>GGAAGGCCTAAAGGGGAGTGGCCCCAGTGGCGGTAGCGGCGGTGGTCCAAATGGTACCTC<br>TTTCAGCTACACATTCCATGGAGACCCTCATGCCATG                    |
| 2             | MTA2      | TCTGGCTTCAGGGATTTCGTTCAAGCTCACAGCCAGCAGCCAAGCGTCAGAACTAAACCC<br>AGCTGATGCCCCCAATCCTGTGGTGTGTTGTGGCCACAAAGGATACCAGGGCCCTACGGAA<br>GGCTCTGACCCATCTGAAATGCGGCGAGCTGCTCGCCGACCAACTGCCCCCTGAAGGT<br>GAAGCCAACGCTGATTGCAGTGGGGCCCCCTGTCCCTCTACCTGCACCCCTCACATC |
| 3             | PTBP2     | AGATTTTGGTAATTCCTCCATTGCATCGTTTTAAGAAAACCTGGATCCAAAAATTTTCAAAA<br>CATTTCCTCCTTCTGCCACCCTTACCTATCTAATATCCCTCCATCAGTAGCAGAAGA<br>GGATCTACGAACACTGTTCGCTAACACTGGGGCACTGTGAAAGCATTAAAGTTTTTCA<br>AAGAGATCACAAAATGGCTTCTTTCAGATGGCAACAGTGGAAAGAAGCTATTACAGG   |
| 4             | SAP30BP   | CAGAACCCCTGGCAGATGTTCAAATCACTTGCAAGACAAGATCCAGAAGCTTTATGAAC<br>GAAAGATAAAGGAGGGAATGGATATGAACTACATTATCCAAAGGAAGAAAGAAATTCGGA<br>ACCCTAGCATCTACGAGAAGCTGATCCAGTTCTGTGCCATTGACGAGCTTGGCACCAACT<br>ACCCAAAGGATATGTTTATCCCATGGCTGGTCTGAGGACTCCTACT            |
| 5             | LCMT1     | ATTGCCAACACTCCTGATAGCTGAATGTGTGCTGGTTTACATGACTCCAGAGCAGTCCGC<br>AAACCTCCTGAAGTGGGCAGCCAACAGTTTTGAGAGAGCCATGTTTATAAACTACGAACA<br>GGTGAACATGGGTGATCGGTTTGGGCAGATCATGATTGAAAACCTGCGGAGACGCCAGTG<br>TGACCTGGCGGGAGTGGAGACCTGCAAGTC                           |
| 6             | SCAP      | CCATTGACATTCGCCGGATGGAGCTAGCAGACCTGAACAAGCGACTGCCCCCTGAGGCCT<br>GCCTGCCCTCAGCCAAGCCAGTGGGACAGCCAACGCGCTACGAGCGGCGAGCTGGCTGTGA<br>GGCCGTCCACCCCAACCATCACGTTGCAGCCGCTTCTTCCGAAAACCTGCGGCTCC<br>CCAAGAGGCTGCGTGTGTCTACTTC                                   |
| gRNA sequence |           | GGTATTACTGATATTGGTGGG                                                                                                                                                                                                                                    |

Table S2: Primers:

| RNA Site | Primer 1                     | Primer 2                   |
|----------|------------------------------|----------------------------|
| 1        | CATGGCATGAGGGTCTCCATGG       | GCGCTACCACCCGGACAAG        |
| 2        | GATGTGAGGGTGCAGGTAGAGGG      | TCTGGCTTCAGGGATTTCGTTCAAG  |
| 3        | AGATTTTGGTAATTCCTCCATTGCATCG | CCTGAATAGCTTCTTCCACTGTTGCC |
| 4        | CAGAACCCCTGGCAGATGTTTC       | AGTAGGAGTCTCAGACCAGCC      |
| 5        | ATTGCCAACACTCCTGATAGCTGAATG  | GACTTGCAGGTCTCCACTCCCG     |
| 6        | GAAGTAGACAACACGACGCTCTTG     | CCATTGACATTCGCCGGATGGAG    |

I5 extension on primer 1s: ACACTCTTTCCTACACGACGCTCTTCCGATCT

I7 extension on primer 2s: GACTGGAGTTCAGACGTGTGCTCTTCCGATCT
