# Supplementary material
Source: PubMed Central journal article supplement (PMC9347300)
Supplement: Supp_TableS3-S5.pdf [file Supp_TableS3-S5.pdf]

Table S3: Summary of the systems modeled and the types of simulations conducted in this study.

| System             | Number of Atoms | Simulation Type         | Simulation Length                                           |
|--------------------|-----------------|-------------------------|-------------------------------------------------------------|
| TadA*0.1-RNA       | 49461           | Unbiased MD             | 1 $\mu$ s                                                   |
| TadA*1.1-RNA       | 49471           |                         |                                                             |
| TadA*0.1(L84F)-RNA | 49456           |                         |                                                             |
| TadA*1.1(L84F)-RNA | 49463           |                         |                                                             |
| TadA*0.1-RNA       | 49461           | Steered MD              | 200 ns                                                      |
| TadA*1.1-RNA       | 49471           |                         |                                                             |
| TadA*0.1(L84F)-RNA | 49456           |                         |                                                             |
| TadA*1.1(L84F)-RNA | 49463           |                         |                                                             |
| TadA*0.1-RNA       | 49461           | Umbrella Sampling       | 41 windows $\times$ 5 $\frac{ns}{window}$ $\times$ 4 sets   |
| TadA*1.1-RNA       | 49471           |                         |                                                             |
| TadA*0.1(L84F)-RNA | 49456           |                         |                                                             |
| TadA*1.1(L84F)-RNA | 49463           |                         |                                                             |
| TadA*0.1-RNA       | 49461           | Umbrella Sampling       | 41 windows $\times$ 10 $\frac{ns}{window}$ $\times$ 5 sets  |
| TadA*0.1           | 45752           | QM/MM Steered MD        | 500 ps                                                      |
| TadA*1.1           | 45740           |                         |                                                             |
| TadA*0.1(L84F)     | 45693           |                         |                                                             |
| TadA*1.1(L84F)     | 45693           |                         |                                                             |
| TadA*0.1-RNA       | 49461           |                         |                                                             |
| TadA*1.1-RNA       | 49471           |                         |                                                             |
| TadA*0.1(L84F)-RNA | 49456           |                         |                                                             |
| TadA*1.1(L84F)-RNA | 49463           |                         |                                                             |
| TadA*0.1-RNA       | 45486           | QM/MM Umbrella Sampling | 13 windows $\times$ 150 $\frac{ps}{window}$ $\times$ 3 sets |
| TadA*1.1-RNA       | 45693           |                         |                                                             |
| TadA*0.1(L84F)-RNA | 49456           |                         |                                                             |
| TadA*1.1(L84F)-RNA | 49463           |                         |                                                             |
| TadA*0.1-RNA       | 49461           |                         |                                                             |
| TadA*1.1-RNA       | 49471           |                         |                                                             |
| TadA*0.1(L84F)-RNA | 49456           |                         |                                                             |
| TadA*1.1(L84F)-RNA | 49463           |                         |                                                             |

Table S4: Analysis of the novelty of mutations in experiments by detecting frequency of prevalence across all hits in the filtered multiple sequence alignment output. \* denotes that the residue site was mutated after the ABE7.10 mutations. Sites which have been mutated multiple times producing conflicting editing outcomes have been colored gray to highlight only the outcome that represents the chemically conserved mutation.

| TadA* Mutation (Laboratory evolution) | DNA-editing outcome | RNA-editing outcome | Literature Reference | Entropy Score ( $H_i$ ) | Frequency of occurrence (within the dataset of natural TadA homologs) |
|---------------------------------------|---------------------|---------------------|----------------------|-------------------------|-----------------------------------------------------------------------|
| R13A                                  | Active              | Active              | [35]                 | 0.65                    | 3                                                                     |
| K20A                                  | Active              | Active              | [35]                 | 0.58                    | 0                                                                     |
| R21A                                  | Active              | Active              | [35]                 | 0.66                    | 0                                                                     |
| W23R                                  | Active              | Active              | [37]                 | 0.65                    | 1                                                                     |
| W23L                                  | Active              | Active              | [37]                 | 0.65                    | 12                                                                    |
| R23A*                                 | Active              | Active              | [35]                 | 0.65                    | 1                                                                     |
| E25A                                  | Active              | Active              | [35]                 | 0.61                    | 2                                                                     |

|        |          |          |      |      |    |
|--------|----------|----------|------|------|----|
| R26A   | Active   | Active   | [35] | 0.60 | 6  |
| E27A   | Inactive | Inactive | [35] | 0.27 | 0  |
| V28G   | Inactive | Inactive | [35] | 0.41 | 1  |
| V30G   | Inactive | Inactive | [35] | 0.27 | 0  |
| H36L   | Active   | Active   | [37] | 0.72 | 1  |
| N46A   | Inactive | Inactive | [35] | 0.07 | 0  |
| R47Q   | Active   | Active   | [38] | 0.65 | 0  |
| R47F   | Active   | Active   | [38] | 0.65 | 0  |
| R47W   | Active   | Active   | [38] | 0.65 | 0  |
| R47M   | Active   | Active   | [38] | 0.65 | 2  |
| P48A   | Active   | Active   | [37] | 0.63 | 0  |
| P48S   | Active   | Active   | [37] | 0.63 | 3  |
| A48G*  | Active   | Active   | [35] | 0.63 | 0  |
| I49A   | Active   | Active   | [35] | 0.54 | 2  |
| R51L   | Active   | Active   | [37] | 0.72 | 3  |
| D53E   | Active   | Active   | [39] | 0.5  | 0  |
| A56G   | Active   | Active   | [35] | 0.64 | 0  |
| E59A   | Inactive | Inactive | [38] | 0    | 0  |
| I76Y   | Active   | Active   | [40] | 0.75 | 0  |
| V82G   | Active   | Inactive | [35] | 0.13 | 0  |
| V82W   | Inactive | Inactive | [35] | 0.13 | 0  |
| V82S   | Active   | Active   | [40] | 0.13 | 0  |
| L84F   | Active   | Active   | [37] | 0.42 | 0  |
| E85A   | Inactive | Inactive | [35] | 0.18 | 0  |
| P86A   | Inactive | Inactive | [35] | 0    | 0  |
| C87A   | Inactive | Inactive | [35] | 0    | 0  |
| C90A   | Inactive | Inactive | [35] | 0    | 0  |
| A106V  | Active   | Active   | [37] | 0.41 | 0  |
| V106G* | Active   | Inactive | [35] | 0.41 | 0  |
| V106W* | Active   | Inactive | [38] | 0.41 | 0  |
| V106Q* | Active   | Inactive | [38] | 0.41 | 0  |
| V106F* | Active   | Inactive | [38] | 0.41 | 0  |
| V106M* | Active   | Inactive | [38] | 0.41 | 0  |
| D108N  | Active   | Active   | [37] | 0.46 | 12 |
| N108A* | Active   | Active   | [35] | 0.46 | 0  |
| N108Q* | Inactive | Inactive | [38] | 0.46 | 0  |
| N108F* | Inactive | Inactive | [38] | 0.46 | 0  |
| N108W* | Inactive | Inactive | [38] | 0.46 | 0  |
| N108M* | Inactive | Inactive | [38] | 0.46 | 0  |
| N108K* | Inactive | Inactive | [38] | 0.46 | 0  |
| A109G  | Active   | Active   | [35] | 0.73 | 0  |
| A109S  | Active   | Active   | [41] | 0.73 | 7  |
| T111A  | Active   | Active   | [35] | 0.71 | 1  |
| T111R  | Active   | Active   | [41] | 0.71 | 0  |
| D119N  | Active   | Active   | [41] | 0.75 | 8  |
| H122N  | Active   | Active   | [41] | 0.79 | 8  |
| H123Y  | Active   | Active   | [37] | 0.79 | 0  |
| Y123H* | Active   | Active   | [40] | 0.79 | 5  |
| A138G  | Active   | Active   | [35] | 0.61 | 0  |
| A142L  | Active   | Active   | [37] | 0.65 | 0  |
| A142G  | Active   | Active   | [35] | 0.65 | 2  |

|        |        |        |      |      |    |
|--------|--------|--------|------|------|----|
| A143G  | Active | Active | [35] | 0.77 | 1  |
| S146C  | Active | Active | [37] | 0.59 | 0  |
| D147Y  | Active | Active | [37] | 0.68 | 0  |
| D147R* | Active | Active | [40] | 0.68 | 0  |
| Y147D* | Active | Active | [41] | 0.68 | 5  |
| F148A  | Active | Active | [35] | 0.11 | 0  |
| F149A  | Active | Active | [35] | 0.37 | 0  |
| F149Y  | Active | Active | [41] | 0.37 | 13 |
| R152P  | Active | Active | [37] | 0.82 | 0  |
| P152A* | Active | Active | [35] | 0.82 | 0  |
| Q154R  | Active | Active | [40] | 0.92 | 0  |
| E155V  | Active | Active | [37] | 0.92 | 1  |
| V155G* | Active | Active | [35] | 0.92 | 0  |
| V155W* | Active | Active | [35] | 0.92 | 0  |
| I156F  | Active | Active | [37] | 0.85 | 0  |
| K157N  | Active | Active | [37] | 0.88 | 0  |
| T166I  | Active | Active | [41] | 1.0  | 1  |
| D167N  | Active | Active | [41] | 1.0  | 1  |

Table S5: Amino acid distribution for individual residue sites of TadA in the naturally occurring homologs of the enzyme. The wild type amino acid in *E. coli* TadA have been highlighted. '-' represents a gap in the alignment.

| Residue Site | Entropy Score ( $H_i$ ) | Amino Acid Distribution                                                                 |
|--------------|-------------------------|-----------------------------------------------------------------------------------------|
| 1            | 0.97                    | '-': 32, 'M': 4                                                                         |
| 2            | 0.97                    | '-': 32, 'S': 4                                                                         |
| 3            | 1.01                    | '-': 32, 'D': 2, 'E': 1, 'S': 1                                                         |
| 4            | 1.00                    | '-': 31, 'V': 3, 'C': 1, 'T': 1                                                         |
| 5            | 0.95                    | '-': 31, 'E': 5                                                                         |
| 6            | 0.99                    | '-': 30, 'L': 3, 'F': 2, 'D': 1                                                         |
| 7            | 0.96                    | '-': 28, 'S': 4, 'D': 3, 'N': 1                                                         |
| 8            | 0.96                    | '-': 28, 'H': 5, 'D': 2, 'E': 1                                                         |
| 9            | 0.76                    | '-': 18, 'E': 13, 'K': 3, 'Q': 1, 'N': 1                                                |
| 10           | 0.64                    | 'Y': 16, '-' : 8, 'K': 5, 'T': 2, 'F': 2, 'L': 1, 'H': 1, 'A': 1                        |
| 11           | 0.56                    | 'F': 13, 'W': 11, '-' : 6, 'Y': 4, 'M': 1, 'G': 1                                       |
| 12           | 0.13                    | 'M': 31, 'L': 5                                                                         |
| 13           | 0.65                    | 'E': 8, 'K': 7, 'R': 6, 'Q': 6, 'A': 3, 'T': 2, 'H': 2, 'G': 2                          |
| 14           | 0.72                    | 'E': 10, 'Q': 5, 'V': 4, 'H': 3, 'T': 3, 'K': 3, 'R': 3, 'L': 2, 'Y': 1, 'C': 1, 'F': 1 |
| 15           | 0.00                    | 'A': 36                                                                                 |
| 16           | 0.44                    | 'L': 20, 'T': 6, 'F': 5, 'M': 3, 'V': 1, 'I': 1                                         |
| 17           | 0.66                    | 'K': 15, 'T': 4, 'E': 3, 'Q': 3, 'R': 2, 'H': 2, 'D': 2, 'L': 2, 'F': 1, 'V': 1, 'A': 1 |
| 18           | 0.61                    | 'E': 9, 'L': 8, 'Q': 7, 'M': 6, 'Y': 2, 'S': 2, 'V': 1, 'A': 1                          |
| 19           | 0.10                    | 'A': 33, 'S': 3                                                                         |
| 20           | 0.58                    | 'K': 15, 'E': 6, 'Q': 6, 'R': 3, 'Y': 2, 'D': 1, 'G': 1, 'V': 1, 'C': 1                 |
| 21           | 0.67                    | 'K': 9, 'R': 7, 'L': 5, 'T': 4, 'E': 4, 'D': 3, 'Y': 2, 'S': 1, 'Q': 1                  |
| 22           | 0.28                    | 'A': 23, 'S': 10, 'G': 3                                                                |
| 23           | 0.65                    | 'L': 12, 'F': 8, 'E': 4, 'W': 3, 'K': 3, 'A': 1, 'G': 1, 'V': 1, 'Y': 1, 'R': 1, 'D': 1 |
| 24           | 0.61                    | 'D': 11, 'E': 9, 'Q': 6, 'N': 3, 'S': 2, 'T': 2, 'A': 1, 'M': 1, 'C': 1                 |
| 25           | 0.61                    | 'K': 13, 'N': 7, 'E': 6, 'L': 2, 'A': 2, 'T': 2, 'P': 2, 'I': 1, 'R': 1                 |

|    |      |                                                                                                                                |
|----|------|--------------------------------------------------------------------------------------------------------------------------------|
| 26 | 0.60 | 'G': 13, 'N': 7, 'A': 6, 'R': 4, 'T': 2, 'D': 1, 'I': 1, 'L': 1, 'S': 1                                                        |
| 27 | 0.27 | 'E': 28, 'S': 3, 'G': 2, 'P': 2, 'Q': 1                                                                                        |
| 28 | 0.42 | 'V': 21, 'I': 8, 'O': 3, 'N': 2, 'G': 1, 'H': 1                                                                                |
| 29 | 0.11 | 'P': 33, 'Q': 2, 'K': 1                                                                                                        |
| 30 | 0.27 | 'V': 23, 'I': 11, 'F': 2                                                                                                       |
| 31 | 0.00 | 'G': 36                                                                                                                        |
| 32 | 0.32 | 'A': 18, 'C': 15, 'V': 2, 'S': 1                                                                                               |
| 33 | 0.36 | 'V': 22, 'L': 6, 'I': 5, 'C': 3                                                                                                |
| 34 | 0.42 | 'I': 18, 'L': 9, 'M': 6, 'V': 2, 'F': 1                                                                                        |
| 35 | 0.13 | 'V': 33, 'T': 1, 'L': 1, 'I': 1                                                                                                |
| 36 | 0.72 | 'K': 10, 'Y': 7, 'H': 3, 'D': 3, 'F': 3, 'E': 3, 'N': 2, 'I': 1, 'L': 1, 'C': 1, 'S': 1, 'Q': 1                                |
| 37 | 0.46 | 'N': 16, 'D': 13, 'S': 2, 'K': 1, 'Q': 1, 'E': 1, 'H': 1, 'G': 1                                                               |
| 38 | 0.61 | 'N': 11, 'G': 10, 'Q': 5, 'D': 3, 'H': 2, 'E': 2, 'A': 1, 'K': 1, 'R': 1                                                       |
| 39 | 0.55 | 'E': 12, 'K': 10, 'R': 7, 'T': 2, 'Q': 2, 'A': 1, 'I': 1, 'N': 1                                                               |
| 40 | 0.22 | 'I': 22, 'V': 14                                                                                                               |
| 41 | 0.27 | 'I': 25, 'V': 9, 'L': 1, 'R': 1                                                                                                |
| 42 | 0.35 | 'G': 24, 'A': 6, 'V': 3, 'S': 2, 'M': 1                                                                                        |
| 43 | 0.59 | 'K': 9, 'R': 8, 'E': 7, 'S': 6, 'I': 3, 'T': 2, 'Q': 1                                                                         |
| 44 | 0.28 | 'G': 26, 'S': 5, 'A': 4, 'T': 1                                                                                                |
| 45 | 0.54 | 'H': 13, 'W': 8, 'R': 7, 'Y': 4, 'G': 2, 'L': 1, 'Q': 1                                                                        |
| 46 | 0.07 | 'N': 34, 'H': 2                                                                                                                |
| 47 | 0.65 | 'E': 8, 'R': 6, 'A': 6, 'N': 6, 'S': 4, 'L': 3, 'M': 2, 'K': 1                                                                 |
| 48 | 0.64 | 'V': 9, 'R': 8, 'P': 6, 'T': 5, 'S': 3, 'I': 2, 'Q': 1, 'O': 1, 'K': 1                                                         |
| 49 | 0.54 | 'E': 13, 'N': 9, 'I': 8, 'A': 2, 'R': 1, 'T': 1, 'V': 1, 'Y': 1                                                                |
| 50 | 0.54 | 'E': 16, 'G': 8, 'Q': 4, 'T': 3, 'S': 2, 'V': 1, 'L': 1, 'P': 1                                                                |
| 51 | 0.72 | 'K': 8, 'T': 7, 'S': 6, 'R': 3, 'L': 3, 'Q': 2, 'E': 2, 'C': 2, 'N': 1, 'D': 1, 'A': 1                                         |
| 52 | 0.55 | 'N': 15, 'K': 8, 'H': 5, 'S': 3, 'Q': 2, 'R': 1, 'G': 1, 'A': 1                                                                |
| 53 | 0.50 | 'D': 13, 'N': 12, 'Q': 6, 'O': 2, 'R': 1, 'S': 1, 'G': 1                                                                       |
| 54 | 0.49 | 'A': 17, 'P': 10, 'S': 2, 'V': 2, 'O': 2, 'D': 2, 'C': 1                                                                       |
| 55 | 0.45 | 'T': 19, 'I': 7, 'L': 5, 'O': 2, 'V': 2, 'S': 1                                                                                |
| 56 | 0.64 | 'A': 12, 'R': 6, 'M': 5, 'C': 4, 'Y': 3, 'Q': 2, 'O': 2, 'L': 1, 'T': 1                                                        |
| 57 | 0.00 | 'H': 36                                                                                                                        |
| 58 | 0.04 | 'A': 35, 'G': 1                                                                                                                |
| 59 | 0.00 | 'E': 36                                                                                                                        |
| 60 | 0.43 | 'I': 15, 'M': 15, 'L': 2, 'H': 1, 'V': 1, 'T': 1, 'A': 1                                                                       |
| 61 | 0.67 | 'I': 9, 'M': 8, 'V': 6, 'N': 5, 'L': 2, 'K': 1, 'A': 1, 'T': 1, 'E': 1, 'S': 1, 'R': 1                                         |
| 62 | 0.07 | 'A': 34, 'V': 2                                                                                                                |
| 63 | 0.28 | 'I': 23, 'L': 11, 'O': 1, 'V': 1                                                                                               |
| 64 | 0.57 | 'R': 11, 'N': 11, 'D': 6, 'O': 5, 'E': 2, 'K': 1                                                                               |
| 65 | 0.65 | 'E': 12, 'Q': 9, 'O': 5, 'N': 3, 'R': 2, 'M': 2, 'G': 1, 'T': 1, 'K': 1                                                        |
| 66 | 0.52 | 'A': 19, 'G': 6, 'O': 6, 'V': 2, 'D': 2, 'S': 1                                                                                |
| 67 | 0.67 | 'G': 10, 'C': 9, 'N': 5, 'O': 5, 'A': 3, 'R': 1, 'L': 1, 'W': 1, 'D': 1                                                        |
| 68 | 0.74 | 'L': 8, 'K': 7, 'A': 5, 'N': 4, 'R': 3, 'O': 2, 'M': 2, 'E': 1, 'S': 1, 'D': 1, 'C': 1, 'W': 1                                 |
| 69 | 0.84 | 'V': 6, 'H': 5, 'N': 4, 'L': 4, 'I': 3, 'A': 2, 'P': 2, 'S': 2, 'F': 1, 'K': 1, 'R': 1, 'W': 1, 'E': 1, 'C': 1, 'O': 1, 'Y': 1 |
| 70 | 0.68 | 'L': 9, 'I': 8, 'E': 6, 'M': 3, 'P': 2, 'C': 2, 'K': 2, 'S': 1, 'G': 1, 'T': 1, 'O': 1                                         |
| 71 | 0.67 | 'G': 9, 'S': 7, 'K': 6, 'Q': 4, 'N': 4, 'D': 2, 'E': 1, 'H': 1, 'A': 1, 'O': 1                                                 |
| 72 | 0.62 | 'N': 13, 'S': 9, 'T': 4, 'Q': 3, 'V': 1, 'E': 1, 'W': 1, 'A': 1, 'G': 1, 'O': 1, 'R': 1                                        |
| 73 | 0.68 | 'Y': 9, 'W': 7, 'K': 7, 'E': 4, 'V': 2, 'T': 2, 'F': 1, 'C': 1, 'H': 1, 'S': 1, 'R': 1                                         |
| 74 | 0.54 | 'R': 17, 'K': 6, 'N': 5, 'D': 3, 'Y': 1, 'E': 1, 'O': 1, 'G': 1, 'Q': 1                                                        |
| 75 | 0.38 | 'L': 25, 'F': 3, 'O': 2, 'A': 2, 'V': 2, 'Q': 1, 'S': 1                                                                        |

|     |      |                                                                                                                 |
|-----|------|-----------------------------------------------------------------------------------------------------------------|
| 76  | 0.75 | 'L': 10, 'E': 6, 'N': 4, 'S': 3, 'K': 3, <b>'T': 2</b> , ' ': 2, 'V': 1, 'P': 1, 'R': 1, 'T': 1, 'D': 1, 'Q': 1 |
| 77  | 0.51 | <b>'D': 16</b> , 'G': 9, 'N': 4, 'H': 3, 'K': 2, 'E': 1, 'P': 1                                                 |
| 78  | 0.58 | 'T': 13, 'C': 8, 'Y': 5, <b>'A': 4</b> , 'S': 3, 'V': 1, 'T': 1, 'G': 1                                         |
| 79  | 0.43 | <b>'T': 20</b> , 'D': 6, 'V': 6, 'S': 2, 'E': 1, 'T': 1                                                         |
| 80  | 0.29 | <b>'L': 26</b> , 'T': 6, 'A': 2, 'M': 2                                                                         |
| 81  | 0.13 | <b>'Y': 31</b> , 'F': 5                                                                                         |
| 82  | 0.14 | <b>'V': 32</b> , 'T': 3, 'T': 1                                                                                 |
| 83  | 0.14 | <b>'T': 32</b> , 'S': 2, 'A': 2                                                                                 |
| 84  | 0.42 | <b>'L': 21</b> , 'V': 6, 'T': 5, 'C': 2, 'T': 1, 'R': 1                                                         |
| 85  | 0.18 | <b>'E': 31</b> , 'Q': 2, 'F': 2, 'S': 1                                                                         |
| 86  | 0.00 | <b>'P': 36</b>                                                                                                  |
| 87  | 0.00 | <b>'C': 36</b>                                                                                                  |
| 88  | 0.62 | 'T': 10, <b>'V': 9</b> , 'A': 6, 'P': 4, 'T': 2, 'N': 2, 'M': 1, 'S': 1, 'Y': 1                                 |
| 89  | 0.18 | <b>'M': 31</b> , 'P': 2, 'E': 2, 'A': 1                                                                         |
| 90  | 0.00 | <b>'C': 36</b>                                                                                                  |
| 91  | 0.40 | <b>'A': 21</b> , 'S': 8, 'C': 4, 'Y': 1, 'L': 1, 'T': 1                                                         |
| 92  | 0.47 | <b>'G': 19</b> , 'A': 8, 'S': 3, 'N': 2, 'K': 2, 'Y': 1, 'D': 1                                                 |
| 93  | 0.14 | <b>'A': 32</b> , 'L': 3, 'T': 1                                                                                 |
| 94  | 0.31 | 'T': 23, 'L': 9, <b>'M': 3</b> , 'V': 1                                                                         |
| 95  | 0.68 | <b>'T': 8</b> , 'R': 6, 'V': 5, 'G': 5, 'A': 4, 'S': 4, 'L': 2, 'Y': 1, 'F': 1                                  |
| 96  | 0.56 | 'L': 14, <b>'H': 10</b> , 'Q': 4, 'F': 2, 'W': 2, 'N': 1, 'M': 1, 'K': 1, 'A': 1                                |
| 97  | 0.41 | <b>'S': 19</b> , 'A': 9, 'L': 4, 'M': 3, 'Y': 1                                                                 |
| 98  | 0.28 | <b>'R': 24</b> , 'G': 8, 'K': 4                                                                                 |
| 99  | 0.26 | <b>'T': 28</b> , 'L': 5, 'V': 1, 'P': 1, 'F': 1                                                                 |
| 100 | 0.50 | 'K': 14, 'P': 12, <b>'G': 3</b> , 'E': 3, 'R': 2, 'S': 1, 'N': 1                                                |
| 101 | 0.52 | <b>'R': 18</b> , 'H': 5, 'L': 5, 'E': 3, 'K': 2, 'F': 1, 'A': 1, 'N': 1                                         |
| 102 | 0.24 | <b>'V': 25</b> , 'L': 10, 'M': 1                                                                                |
| 103 | 0.39 | <b>'V': 18</b> , 'T': 10, 'F': 6, 'Y': 2                                                                        |
| 104 | 0.31 | 'Y': 21, <b>'F': 12</b> , 'T': 2, 'M': 1                                                                        |
| 105 | 0.24 | <b>'G': 29</b> , 'S': 3, 'M': 2, 'A': 1, ' ': 1                                                                 |
| 106 | 0.43 | <b>'A': 21</b> , 'C': 7, ' ': 3, 'S': 3, 'E': 1, 'N': 1                                                         |
| 107 | 0.74 | 'S': 12, <b>'R': 5</b> , 'Q': 4, ' ': 3, 'N': 2, 'L': 2, 'H': 2, 'D': 1, 'F': 1, 'K': 1, 'E': 1, 'P': 1, 'T': 1 |
| 108 | 0.46 | <b>'D': 17</b> , 'N': 12, ' ': 3, 'C': 1, 'Y': 1, 'H': 1, 'V': 1                                                |
| 109 | 0.73 | 'S': 7, 'E': 6, 'P': 5, 'Q': 5, <b>'A': 4</b> , 'N': 2, 'K': 2, ' ': 2, 'Y': 1, 'T': 1, 'D': 1                  |
| 110 | 0.47 | <b>'K': 20</b> , 'R': 6, 'D': 4, 'N': 2, ' ': 2, 'S': 1, 'F': 1                                                 |
| 111 | 0.71 | 'F': 12, 'H': 5, <b>'T': 4</b> , 'G': 3, 'L': 2, 'P': 2, ' ': 2, 'E': 2, 'Y': 1, 'S': 1, 'Q': 1, 'A': 1         |
| 112 | 0.32 | <b>'G': 26</b> , 'K': 4, 'A': 3, ' ': 2, 'D': 1                                                                 |
| 113 | 0.64 | 'G': 13, <b>'A': 9</b> , 'N': 2, 'C': 2, 'V': 2, ' ': 2, 'T': 2, 'H': 1, 'K': 1, 'E': 1, 'T': 1                 |
| 114 | 0.64 | <b>'A': 10</b> , 'V': 8, 'C': 7, 'S': 4, ' ': 2, 'T': 1, 'L': 1, 'R': 1, 'N': 1, 'E': 1                         |
| 115 | 0.59 | <b>'G': 16</b> , 'E': 6, 'D': 5, ' ': 2, 'A': 2, 'Q': 1, 'F': 1, 'P': 1, 'V': 1, 'K': 1                         |
| 116 | 0.41 | <b>'S': 25</b> , ' ': 3, 'K': 2, 'R': 2, 'F': 1, 'T': 1, 'L': 1, 'N': 1                                         |
| 117 | 0.57 | <b>'L': 15</b> , 'V': 7, 'N': 5, 'G': 3, ' ': 3, 'R': 1, 'Y': 1, 'T': 1                                         |
| 118 | 0.62 | 'L': 14, 'T': 5, 'Y': 5, <b>'M': 3</b> , ' ': 3, 'F': 2, 'K': 2, 'V': 2                                         |
| 119 | 0.75 | 'N': 8, 'R': 6, <b>'D': 5</b> , 'Q': 5, ' ': 5, 'L': 2, 'H': 1, 'C': 1, 'K': 1, 'S': 1, 'E': 1                  |
| 120 | 0.66 | 'T': 10, 'Y': 7, <b>'V': 6</b> , ' ': 6, 'L': 4, 'F': 2, 'C': 1                                                 |
| 121 | 0.55 | <b>'L': 13</b> , 'F': 11, ' ': 5, 'A': 4, 'S': 2, 'K': 1                                                        |
| 122 | 0.79 | 'N': 8, 'T': 5, ' ': 5, <b>'H': 4</b> , 'S': 4, 'D': 3, 'Q': 2, 'C': 1, 'T': 1, 'G': 1, 'K': 1, 'R': 1          |
| 123 | 0.79 | 'D': 8, <b>'H': 5</b> , 'S': 5, ' ': 4, 'A': 3, 'Q': 2, 'E': 2, 'K': 2, 'M': 2, 'N': 1, 'L': 1, 'T': 1          |
| 124 | 0.70 | <b>'P': 12</b> , 'E': 6, ' ': 5, 'S': 4, 'L': 2, 'K': 2, 'A': 2, 'Y': 1, 'F': 1, 'N': 1                         |

|     |      |                                                                                                                |
|-----|------|----------------------------------------------------------------------------------------------------------------|
| 125 | 0.84 | 'G': 7, 'R': 6, ' ': 5, 'N': 3, 'A': 3, 'T': 2, 'S': 2, 'D': 2, 'K': 1, 'F': 1, 'Q': 1, 'E': 1, 'V': 1, 'H': 1 |
| 126 | 0.77 | 'L': 6, 'C': 6, 'T': 6, ' ': 5, 'M': 4, 'P': 2, 'K': 2, 'F': 2, 'V': 2, 'S': 1                                 |
| 127 | 0.64 | 'N': 14, 'G': 6, 'F': 5, ' ': 5, 'T': 2, 'D': 1, 'H': 1, 'E': 1, 'S': 1                                        |
| 128 | 0.63 | 'H': 17, ' ': 4, 'Y': 3, 'T': 3, 'K': 2, 'R': 2, 'F': 2, 'E': 1, 'N': 1, 'V': 1                                |
| 129 | 0.60 | 'R': 17, 'K': 5, 'P': 3, ' ': 3, 'A': 2, 'G': 2, 'T': 1, 'Q': 1, 'S': 1, 'E': 1                                |
| 130 | 0.68 | 'V': 10, 'P': 6, 'F': 6, 'L': 3, 'T': 3, ' ': 3, 'A': 2, 'K': 2, 'Y': 1                                        |
| 131 | 0.65 | 'E': 11, 'Q': 8, 'K': 6, ' ': 4, 'D': 2, 'F': 2, 'S': 1, 'T': 1, 'C': 1                                        |
| 132 | 0.52 | 'T': 13, 'V': 11, 'C': 6, ' ': 5, 'Y': 1                                                                       |
| 133 | 0.77 | 'P': 7, 'Y': 6, 'E': 5, 'T': 4, ' ': 4, 'K': 3, 'V': 2, 'P': 2, 'D': 1, 'W': 1, 'R': 1                         |
| 134 | 0.79 | 'S': 8, ' ': 6, 'R': 5, 'E': 4, 'K': 3, 'P': 3, 'G': 3, 'Q': 1, 'A': 1, 'N': 1, 'T': 1                         |
| 135 | 0.38 | 'G': 26, ' ': 6, 'E': 1, 'N': 1, 'H': 1, 'Y': 1                                                                |
| 136 | 0.60 | 'T': 8, 'L': 8, 'V': 7, 'Y': 7, ' ': 6                                                                         |
| 137 | 0.57 | 'L': 18, ' ': 5, 'M': 4, 'R': 4, 'Q': 2, 'P': 1, 'F': 1, 'A': 1                                                |
| 138 | 0.61 | 'A': 17, ' ': 5, 'S': 4, 'R': 3, 'E': 3, 'Q': 1, 'K': 1, 'L': 1, 'N': 1                                        |
| 139 | 0.61 | 'E': 16, 'A': 5, ' ': 5, 'D': 4, 'S': 2, 'K': 2, 'R': 1, 'N': 1                                                |
| 140 | 0.48 | 'E': 18, 'D': 8, 'K': 4, ' ': 3, 'H': 2, 'A': 1                                                                |
| 141 | 0.42 | 'C': 17, 'A': 8, 'S': 8, ' ': 3                                                                                |
| 142 | 0.65 | 'A': 11, 'S': 7, 'V': 6, 'R': 3, ' ': 3, 'G': 2, 'T': 2, 'K': 1, 'Q': 1                                        |
| 143 | 0.77 | 'E': 8, 'N': 6, 'K': 4, 'T': 3, 'L': 3, ' ': 3, 'Q': 2, 'D': 2, 'F': 2, 'A': 1, 'G': 1, 'S': 1                 |
| 144 | 0.49 | 'L': 16, 'T': 10, 'M': 4, ' ': 3, 'Y': 2, 'K': 1                                                               |
| 145 | 0.46 | 'L': 17, 'M': 11, ' ': 3, 'N': 2, 'V': 2, 'F': 1                                                               |
| 146 | 0.59 | 'K': 13, 'S': 8, 'Q': 6, 'T': 3, ' ': 3, 'T': 1, 'R': 1, 'A': 1                                                |
| 147 | 0.68 | 'T': 13, 'D': 5, 'E': 5, 'G': 3, ' ': 3, 'N': 2, 'S': 1, 'A': 1, 'Q': 1, 'C': 1, 'K': 1                        |
| 148 | 0.11 | 'F': 33, ' ': 3                                                                                                |
| 149 | 0.37 | 'F': 23, 'Y': 7, ' ': 5, 'T': 1                                                                                |
| 150 | 0.49 | 'K': 15, 'R': 11, ' ': 6, 'Q': 4                                                                               |
| 151 | 0.83 | ' ': 14, 'Q': 6, 'K': 5, 'M': 4, 'R': 4, 'E': 2, 'N': 1                                                        |
| 152 | 0.84 | ' ': 14, 'R': 5, 'K': 5, 'G': 5, 'T': 4, 'L': 1, 'M': 1, 'E': 1                                                |
| 153 | 0.60 | 'R': 19, ' ': 15, 'N': 1, 'P': 1                                                                               |
| 154 | 0.92 | ' ': 19, 'E': 6, 'Q': 4, 'K': 2, 'S': 2, 'N': 1, 'T': 1, 'P': 1                                                |
| 155 | 0.92 | ' ': 19, 'R': 5, 'E': 4, 'N': 4, 'T': 1, 'V': 1, 'A': 1, 'D': 1                                                |
| 156 | 0.86 | ' ': 21, 'T': 7, 'K': 6, 'L': 1, 'A': 1                                                                        |
| 157 | 0.88 | ' ': 24, 'K': 9, 'R': 1, 'S': 1, 'P': 1                                                                        |
| 158 | 0.93 | ' ': 25, 'T': 5, 'A': 4, 'S': 1, 'K': 1                                                                        |
| 159 | 1.00 | ' ': 25, 'A': 4, 'L': 2, 'Q': 1, 'E': 1, 'N': 1, 'H': 1, 'P': 1                                                |
| 160 | 0.85 | ' ': 25, 'K': 10, 'R': 1                                                                                       |
| 161 | 0.98 | ' ': 31, 'K': 4, 'V': 1                                                                                        |
| 162 | 1.00 | ' ': 31, 'A': 3, 'S': 1, 'R': 1                                                                                |
| 163 | 1.01 | ' ': 31, 'D': 2, 'Q': 1, 'T': 1, 'K': 1                                                                        |
| 164 | 1.01 | ' ': 31, 'R': 2, 'S': 1, 'N': 1, 'D': 1                                                                        |
| 165 | 1.00 | ' ': 32, 'S': 2, 'A': 2                                                                                        |
| 166 | 1.01 | ' ': 34, 'T': 1, 'T': 1                                                                                        |
| 167 | 1.01 | ' ': 34, 'D': 1, 'N': 1                                                                                        |
